# Supplementary material for: A Systematic Review and Meta-Analysis of Risk Factors Associated with Severity and Death in COVID-19 Patients
Source: PubMed Central journal article supplement (PMC8040926; doi:10.1155/2021/6660930), 2021-04-10
Supplement: 6660930.f1.pdf [file 6660930.f1.pdf]

**Supporting material 1.** Characteristics of studies included in the meta-ana

| <b>PMID</b>     | <b>AUTHOR</b> | <b>YEAR</b> | <b>COUNTRY</b> | <b>Ethnicity</b> | <b>SAMPLE SIZE</b> |
|-----------------|---------------|-------------|----------------|------------------|--------------------|
| <b>32217556</b> | Chen T        | 2020        | China          | Chinese          | 274                |
| <b>32217650</b> | Guan WJ       | 2020a       | China          | Chinese          | 1590               |
| <b>32269088</b> | Du RH         | 2020        | China          | Chinese          | 179                |
| <b>32188484</b> | Shi Y         | 2020        | China          | Chinese          | 487                |
| <b>32294485</b> | Li XC         | 2020        | China          | Chinese          | 548                |
| <b>32304745</b> | Zhang JX      | 2020        | China          | Chinese          | 663                |
| <b>31986264</b> | Huang CL      | 2020        | China          | Chinese          | 41                 |
| <b>32031570</b> | Wang DW       | 2020        | China          | Chinese          | 138                |
| <b>32105632</b> | Yang XB       | 2020        | China          | Chinese          | 52                 |
| <b>32109013</b> | Guan WJ       | 2020b       | China          | Chinese          | 1099               |
| <b>32167524</b> | Wu CM         | 2020        | China          | Chinese          | 201                |
| <b>32171076</b> | Zhou F        | 2020        | China          | Chinese          | 191                |
| <b>32191764</b> | Yuan ML       | 2020        | China          | Chinese          | 27                 |

---

|                 |       |      |       |         |     |
|-----------------|-------|------|-------|---------|-----|
| <b>32173725</b> | Mo PZ | 2020 | China | Chinese | 155 |
|-----------------|-------|------|-------|---------|-----|

---

|                 |         |      |       |         |    |
|-----------------|---------|------|-------|---------|----|
| <b>32176772</b> | Wang ZL | 2020 | China | Chinese | 69 |
|-----------------|---------|------|-------|---------|----|

---

|                 |       |      |       |         |     |
|-----------------|-------|------|-------|---------|-----|
| <b>32409504</b> | Shi Q | 2020 | China | Chinese | 306 |
|-----------------|-------|------|-------|---------|-----|

---

|                 |             |      |       |         |      |
|-----------------|-------------|------|-------|---------|------|
| <b>32564693</b> | Iaccarino G | 2020 | Italy | Italian | 1591 |
|-----------------|-------------|------|-------|---------|------|

---

lysis

---

### CASE CHARACTERISTICS

---

mean age 62 years; 171 males, 103 females;  
<40 years 53, 40-60 years 68,  $\geq 60$  years 153

---

mean age: 48.9 $\pm$ 16.3 years; 904 males; 674 females

---

mean age 57.6 $\pm$ 13.7 years; 97 males, 82 females; 0-49 years 49, 50-64 years 65;  $\geq 65$  years 65

---

mean age 46 years; 259 males, 228 females

---

mean age 60 years; 279 males, 269 females;  
0-44 years 107, 45-64 years 231,  $\geq 65$  years 210

---

mean age 55.6 years; 321 males, 342 females; 0-60 years 348, > 60 years 315

---

mean age 49 years; 30 males, 11 females

---

mean age 56 years; 75 males, 63 females

---

mean age 59.7 years; 35 males, 17 females;  
30-60 years 25, > 60 years 27

---

mean age: 47 years; 639 males; 460 females;  
0-65 years 849;  $\geq 65$  years 153

---

mean age 51 years; 128 males, 73 females

---

mean age 56 years; 119 males, 72 females

---

mean age 56 years; 12 males, 15 females

---

mean age 54 years; 86 males, 69 females

---

mean age 42 years; 32 males, 37 females

---

Patients without diabetes: mean age 65  
years; Patients with diabetes: mean age 64  
years; each group: 75 males, 78 females  
mean age  $66.5 \pm 0.4$  years; 1018 males, 573  
females

---

---

## Study design

---

A retrospective study obtained epidemiological, clinical, laboratory, and radiological characteristics, as well as treatment and outcome data, from electronic medical records for deceased patients and recovered patients by using data collection forms.

---

A retrospective case study compiled the clinical data of laboratory-confirmed hospitalized cases from 575 hospitals between December 11<sup>th</sup>, 2019 and January 31<sup>st</sup>, 2020

---

The written informed consent from each patient was waived since we prospectively collected and analyzed all data from each patient according to the policy for public health outbreak investigation of emerging infectious diseases issued by the National Health Commission of the People's Republic of China.

---

A retrospective study obtained medical records, laboratory findings, and pulmonary CT scan of each patient with COVID-19, provided by the local health authority and inputted into a pre-specified electronic data collection form.

---

The epidemiological and demographic data were obtained by face-to-face or telephone interview. Clinical symptoms, laboratory, and radiological findings on admission as well as the complications, treatment and outcomes during hospitalization were extracted from electronic medical records.

---

A retrospective study obtained oral informed consent from all patients enrolled in the study.

---

Local centres for disease control and prevention collected respiratory, blood, and faeces specimens, then shipped them to designated authoritative laboratories to detect the pathogen.

---

The data were reviewed by a trained team of physicians. Information recorded included demographic data, medical history, exposure history, underlying comorbidities, symptoms, signs, laboratory findings, chest computed tomographic (CT) scans, and treatment measures (ie, antiviral therapy, corticosteroid therapy, respiratory support, kidney replacement therapy).

---

The retrospective, observational study obtained clinical electronic medical records, nursing records, laboratory findings, and radiological examinations for all patients with laboratory confirmed SARS-CoV-2 infection.

---

The study obtained the medical records and compiled data for hospitalized patients and outpatients with laboratory-confirmed Covid-19.

---

A trained team of physicians and medical students reviewed and collected epidemiological, clinical, and outcomes data from electronic medical records.

---

Epidemiological, demographic, clinical, laboratory, treatment, and outcome data were extracted from electronic medical records using a standardised data collection form.

---

Clinical characteristics together with chest imaging manifestations of each confirmed cases were recorded.

---

A COVID-19 case report form was designed to document primary data regarding demographic, clinical, laboratory, radiological and therapeutic characteristics from electronic medical records

---

The study obtains clinical charts, nursing records, laboratory results, and chest CT characteristics for all patients.

---

Epidemiological, demographic, clinical, laboratory, treatment, and outcome data were extracted from electronic medical records using a standardised data collection form.

---

An online questionnaire was distributed among the centers to collect reviewed epidemiological, clinical, and outcomes data from hospital emergency rooms and regular and intensive care wards.

---

| <b>Clinical typing of COVID-19(No)</b>                                                      | <b>Young age( &lt;60 or &lt;65 years)</b>                                                  | <b>advanced age</b>                                                                       | <b>Male</b>                                                                                 |
|---------------------------------------------------------------------------------------------|--------------------------------------------------------------------------------------------|-------------------------------------------------------------------------------------------|---------------------------------------------------------------------------------------------|
| Recovered patients: 161;<br>Deaths: 113                                                     | Recovered patients: 102;<br>Deaths: 19                                                     | Recovered patients: 59;<br>Deaths: 94                                                     | Recovered patients: 88;<br>Deaths: 83                                                       |
| Mild: 1286; Severe: 254;<br>Deaths: 50                                                      | -                                                                                          | -                                                                                         | -                                                                                           |
| Deceased: 21; Survivors:<br>158                                                             | Survivors: 110; Deceased:<br>4                                                             | Survivors: 48; Deceased: 17                                                               | Survivors: 87; Deceased: 10                                                                 |
| Mild: 438; Severe: 49                                                                       | -                                                                                          | -                                                                                         | Mild: 223; Severe: 36                                                                       |
| Nonsevere: 279; Severe:<br>269                                                              | Nonsevere: 204; Severe:<br>134                                                             | Nonsevere: 75; Severe: 135                                                                | Nonsevere: 126; Severe: 153                                                                 |
| Mild to Moderate: 254;<br>Severe: 315; Critical: 94;<br>Survival: 638, Non-survi<br>val: 25 | Mild to Moderate: 185;<br>Severe: 136; Critical: 27;<br>Survival: 342, Non-survi<br>val: 6 | Mild to Moderate: 69;<br>Severe: 179; Critical: 67;<br>Survival: 296, Non-survival:<br>19 | Mild to Moderate: 116;<br>Severe: 149; Critical: 56;<br>Survival: 306, Non-survi<br>val: 15 |
| Mild: 28; Severe: 13                                                                        | -                                                                                          | -                                                                                         | Mild: 19; Severe: 11                                                                        |
| Mild: 102; Severe: 36                                                                       | -                                                                                          | -                                                                                         | Mild: 53; Severe: 22                                                                        |
| Deceased: 32; Survivors: 20                                                                 | Survivors: 13; Deceased:<br>12                                                             | Survivors: 7; Deceased: 20                                                                | Survivors: 14; Deceased: 21                                                                 |
| Mild: 926; Severe: 173                                                                      | Mild: 739; Severe: 119                                                                     | Mild: 109; Severe: 44                                                                     | Mild: 537; Severe: 100                                                                      |
| Mild: 117; Severe: 84                                                                       | -                                                                                          | -                                                                                         | Mild: 68; Severe: 60                                                                        |
| Deceased: 54; Survivors:<br>137                                                             | -                                                                                          | -                                                                                         | Survivors: 81; Deceased: 38                                                                 |
| Survivors: 17; Deceased: 10                                                                 | -                                                                                          | -                                                                                         | Survivors: 8; Deceased: 4                                                                   |

Mild: 70; Severe: 85

-

-

Mild: 31; Severe: 55

---

Mild: 55; Severe: 14

-

-

Mild: 15; Severe: 7

---

Survival: 259; Death: 47

-

-

Survivors: 122; Death: 28

---

Nonsurvivors: 188;  
Survivors: 1403

---

-

-

-



| <b>Female</b>                                                                               | <b>Smoking</b>                       | <b>No Smoking</b>                       | <b>Chronic lung diseases</b>                                                         |
|---------------------------------------------------------------------------------------------|--------------------------------------|-----------------------------------------|--------------------------------------------------------------------------------------|
| Recovered patients: 73;<br>Deaths: 30                                                       | Recovered patients:<br>10; Deaths: 9 | Recovered patients:<br>151; Deaths: 104 | Recovered patients: 7; Deaths: 11                                                    |
| -                                                                                           | -                                    | -                                       | Mild: 3; Severe: 15; Deaths: 6                                                       |
| Survivors: 71; Deceased: 11                                                                 | -                                    | -                                       | -                                                                                    |
| Mild: 215; Severe: 13                                                                       | Mild: 34; Severe: 6                  | Mild: 391; Severe: 43                   | -                                                                                    |
| Nonsevere: 153; Severe:<br>116                                                              | Nonsevere: 41; Severe:<br>51         | Nonsevere: 238;<br>Severe: 214          | Nonsevere: 4; Severe: 13                                                             |
| Mild to Moderate: 138;<br>Severe: 166; Critical: 38;<br>Survival: 332, Non-survi<br>val: 10 | -                                    | -                                       | Mild to Moderate: 13; Severe: 23;<br>Critical: 15; Survival: 46, Non-survi<br>val: 5 |
| Mild: 9; Severe: 2                                                                          | -                                    | -                                       | Mild: 0; Severe: 1                                                                   |
| Mild: 51; Severe: 14                                                                        | -                                    | -                                       | Mild: 1; Severe: 3                                                                   |
| Survivors: 6; Deceased: 11                                                                  | -                                    | -                                       | Survivors: 2; Deceased: 2                                                            |
| Mild: 386; Severe: 73                                                                       | Mild: 120; Severe: 38                | Mild: 793; Severe: 134                  | Mild: 6; Severe: 6                                                                   |
| Mild: 49; Severe: 24                                                                        | -                                    | -                                       | -                                                                                    |
| Survivors: 56; Deceased: 16                                                                 | -                                    | -                                       | Survivors: 2; Deceased: 4                                                            |
| Survivors: 9; Deceased: 6                                                                   | -                                    | -                                       | Survivors: 1; Deceased: 10                                                           |

Mild: 39; Severe: 30

-

-

Mild: 0; Severe: 4

---

Mild: 30; Severe: 7

-

-

Mild: 2; Severe: 2

---

Survivors: 137; Death: 19

-

-

Survivors: 14; Death: 7

---

-

-

-

Nonsurvivors: 28; Survivors: 94

---

| <b>Diabetes</b>                                                               | <b>Hypertension</b>                | <b>Chronic kidney disease</b>    | <b>Cardiovascular disease</b>                                                   | <b>TYPE</b>          |
|-------------------------------------------------------------------------------|------------------------------------|----------------------------------|---------------------------------------------------------------------------------|----------------------|
| Recovered patients: 23; Deaths: 24                                            | Recovered patients: 39; Deaths: 54 | Recovered patients: 1; Deaths: 4 | Recovered patients: 7; Deaths: 16                                               | retrospective cohort |
| Mild: 72; Severe: 45; Deaths: 13                                              | Mild: 153; Severe: 88; Deaths: 28  | Mild: 8; Severe: 8; Deaths: 5    | Mild: 31; Severe: 20; Deaths: 8                                                 | retrospective cohort |
| Survivors: 27; Deceased: 6                                                    | Survivors: 45; Deceased: 13        | -                                | Survivors: 17; Deceased: 12                                                     | retrospective cohort |
| Mild: 22; Severe: 7                                                           | Mild: 73; Severe: 26               | Mild: 5; Severe: 2               | Mild: 7; Severe: 4                                                              | retrospective cohort |
| Nonsevere: 31; Severe: 52                                                     | Nonsevere: 62; Severe: 104         | Nonsevere: 4; Severe: 6          | Nonsevere: 6; Severe: 28                                                        | ambispective cohort  |
| Mild to Moderate: 14; Severe: 39; Critical: 14; Survival: 64, Non-survival: 5 | -                                  | -                                | Mild to Moderate: 33; Severe: 82; Critical: 49; Survival: 148, Non-survival: 16 | retrospective cohort |
| Mild: 7; Severe: 1                                                            | Mild: 4; Severe: 2                 | -                                | Mild: 3; Severe: 3                                                              | retrospective cohort |
| Mild: 6; Severe: 8                                                            | Mild: 22; Severe: 21               | Mild: 2; Severe: 2               | Mild: 11; Severe: 9                                                             | retrospective cohort |
| Survivors: 2; Deceased: 7                                                     | -                                  | -                                | Survivors: 2; Deceased: 3                                                       | retrospective cohort |
| Mild: 53; Severe: 28                                                          | Mild: 124; Severe: 41              | Mild: 5; Severe: 3               | Mild: 17; Severe: 10                                                            | retrospective cohort |
| Mild: 6; Severe: 16                                                           | Mild: 16; Severe: 23               | -                                | Mild: 3; Severe: 5                                                              | retrospective cohort |
| Survivors: 19; Deceased: 17                                                   | Survivors: 32; Deceased: 26        | Survivors: 0; Deceased: 2        | Survivors: 2; Deceased: 13                                                      | retrospective cohort |
| Survivors: 0; Deceased: 6                                                     | Survivors: 0; Deceased: 5          | -                                | Survivors: 0; Deceased: 3                                                       | retrospective        |

|                                  |                                   |                                 |                                  |                 |
|----------------------------------|-----------------------------------|---------------------------------|----------------------------------|-----------------|
| Mild: 3; Severe: 12              | Mild: 15; Severe: 22              | Mild: 2; Severe: 4              | Mild: 0; Severe: 14              | retrospective   |
| Mild: 1; Severe: 6               | Mild: 4; Severe: 5                | -                               | Mild: 3; Severe: 5               | retrospective   |
| Survivors: 122; Death: 31        | Survivors: 99; Death: 32          | Survivors: 7; Death: 5          | Survivors: 32; Death: 17         | retrospective   |
| Nonsurvivors: 61; Survivors: 208 | Nonsurvivors: 137; Survivors: 737 | Nonsurvivors: 31; Survivors: 56 | Nonsurvivors: 56; Survivors: 160 | cross-sectional |

---

**Studies quality  
(AHQR or NOS)**

---

7

---

8

---

8

---

7

---

8

---

7

---

7

---

7

---

7

---

8

---

7

---

8

---

7

---

7

---

7

---

8

8
